# Supplementary material for: Effect of daily consumption of probiotic yoghurt on albumin to creatinine ratio, eGFR and metabolic parameters in patients with type 2 diabetes with microalbuminuria: study protocol for a randomised controlled clinical trial
Source: HighWire-hosted journal article supplement (doi:10.1136/bmjopen-2021-056110), 2022-03-01
Supplement: bmjopen-2021-056110supp001_data_supplement.pdf [file bmjopen-2021-056110supp001_data_supplement.pdf]

**Supplementary file****A) Food recall**

| <b>Days</b>         | <b>Meals</b> | <b>Time</b> | <b>Food items</b> | <b>Serving</b> | <b>Amount (gr)</b> |
|---------------------|--------------|-------------|-------------------|----------------|--------------------|
| Day 1 (working day) |              |             |                   |                |                    |
|                     |              |             |                   |                |                    |
|                     |              |             |                   |                |                    |
|                     |              |             |                   |                |                    |
|                     |              |             |                   |                |                    |
|                     |              |             |                   |                |                    |
|                     |              |             |                   |                |                    |
|                     |              |             |                   |                |                    |
| Day 2 (working day) |              |             |                   |                |                    |
|                     |              |             |                   |                |                    |
|                     |              |             |                   |                |                    |
|                     |              |             |                   |                |                    |
|                     |              |             |                   |                |                    |
|                     |              |             |                   |                |                    |
|                     |              |             |                   |                |                    |
|                     |              |             |                   |                |                    |
|                     |              |             |                   |                |                    |
| Day 3 (weekend)     |              |             |                   |                |                    |
|                     |              |             |                   |                |                    |
|                     |              |             |                   |                |                    |
|                     |              |             |                   |                |                    |
|                     |              |             |                   |                |                    |
|                     |              |             |                   |                |                    |
|                     |              |             |                   |                |                    |
|                     |              |             |                   |                |                    |

**B) Physical activity record**

| <b>Days</b>         | <b>Activity description</b> | <b>Time</b> | <b>Duration</b> | <b>Intensity<br/>(light, moderate, vigorous)</b> |
|---------------------|-----------------------------|-------------|-----------------|--------------------------------------------------|
| Day 1 (working day) |                             |             |                 |                                                  |
|                     |                             |             |                 |                                                  |
|                     |                             |             |                 |                                                  |
|                     |                             |             |                 |                                                  |
|                     |                             |             |                 |                                                  |
|                     |                             |             |                 |                                                  |
|                     |                             |             |                 |                                                  |
|                     |                             |             |                 |                                                  |
| Day 2 (weekend)     |                             |             |                 |                                                  |
|                     |                             |             |                 |                                                  |
|                     |                             |             |                 |                                                  |
|                     |                             |             |                 |                                                  |
|                     |                             |             |                 |                                                  |
|                     |                             |             |                 |                                                  |
|                     |                             |             |                 |                                                  |
|                     |                             |             |                 |                                                  |
